# Supplementary material
Source: PubMed Central journal article supplement (PMC5527992)
Supplement: NIHMS866561-supplement.pdf [file NIHMS866561-supplement.pdf]

**SUPPLEMENTAL MATERIAL**

**Supplemental Table 1. Observed Outcomes by Quartiles of Everyday Discrimination**

|                                 | <b>Quartile 1<br/>Lowest Discrimination</b> | <b>Quartile 2</b>      | <b>Quartile 3</b>      | <b>Quartile 4<br/>Highest<br/>Discrimination</b> | <b>P<br/>value</b> |
|---------------------------------|---------------------------------------------|------------------------|------------------------|--------------------------------------------------|--------------------|
| All-cause mortality             | 228, 22.1 (19.3, 25.3)                      | 120, 12.5 (10.4, 15.1) | 129, 12.3 (10.4, 14.7) | 96, 9.6 (7.7, 11.8)                              | < .001             |
| Incident stroke                 | 52, 5.5 (4.1, 7.4)                          | 40, 4.0 (3.0, 5.5)     | 35, 3.4 (2.4, 4.8)     | 29, 3.0 (2.0, 4.4)                               | .02                |
| Incident coronary heart disease | 57, 5.9 (4.5, 7.8)                          | 52, 5.8 (4.4, 7.6)     | 45, 4.5 (3.3, 6.0)     | 39, 4.2 (3.0, 5.9)                               | .09                |
| Heart Failure Hospitalization   | 128, 11.7 (10.0, 13.8)                      | 78, 7.5 (6.0, 9.3)     | 80, 6.9 (5.6, 8.5)     | 62, 5.7 (4.4, 7.2)                               | < .001             |

For each outcome, values shown are number of events, cumulative incidence (%) (95% confidence interval)

**Supplemental Table 2. Observed Outcomes by Quartiles of Lifetime Discrimination**

|                                 | <b>Quartile 1<br/>Lowest Discrimination</b> | <b>Quartile 2</b>     | <b>Quartile 3</b>      | <b>Quartile 4<br/>Highest<br/>Discrimination</b> | <b><i>P</i><br/>value</b> |
|---------------------------------|---------------------------------------------|-----------------------|------------------------|--------------------------------------------------|---------------------------|
| All-cause mortality             | 225, 19.1 (16.7, 21.9)                      | 96, 14.0 (11.4, 17.1) | 146, 12.1 (10.2, 14.4) | 106, 10.9 (9.0, 13.2)                            | < .001                    |
| Incident stroke                 | 57, 5.3 (4.0, 7.0)                          | 29, 4.5 (3.1, 6.5)    | 45, 3.7 (2.7, 5.0)     | 25, 2.4 (1.6, 3.5)                               | .02                       |
| Incident coronary heart disease | 66, 6.2 (4.8, 7.9)                          | 40, 6.4 (4.6, 8.9)    | 50, 4.2 (3.1, 5.7)     | 37, 4.0 (2.9, 5.6)                               | .02                       |
| Heart Failure Hospitalization   | 128, 10.3 (8.7, 12.1)                       | 61, 8.6 (6.7, 10.9)   | 91, 6.6 (5.4, 8.1)     | 68, 6.4 (5.1, 8.0)                               | < .001                    |

For each outcome, values shown are number of events, cumulative incidence (%) (95% confidence interval)

**Supplemental Table 3. Hazard ratios for the Associations of Burden of Lifetime Discrimination and All-cause Mortality, Incident Stroke, Incident Coronary Heart Disease, and Heart Failure Hospitalization.**

| Model                                      | All-cause mortality      |                     | Incident stroke          |                     | Coronary heart disease   |                     | Heart failure hospitalization |                     |
|--------------------------------------------|--------------------------|---------------------|--------------------------|---------------------|--------------------------|---------------------|-------------------------------|---------------------|
|                                            | Hazard Ratio<br>(95% CI) | <i>p</i> -<br>value | Hazard Ratio<br>(95% CI) | <i>p</i> -<br>value | Hazard Ratio<br>(95% CI) | <i>p</i> -<br>value | Hazard Ratio<br>(95% CI)      | <i>p</i> -<br>value |
| M1: Unadjusted                             | 0.99 (0.89, 1.10)        | .83                 | 0.88 (0.72, 1.07)        | .19                 | 0.96 (0.80, 1.14)        | .63                 | 0.96 (0.84, 1.10)             | .55                 |
| M2: Age and Sex                            | 0.97 (0.88, 1.08)        | .60                 | 0.88 (0.72, 1.07)        | .19                 | 0.95 (0.79, 1.13)        | .53                 | 0.96 (0.84, 1.09)             | .51                 |
| M3:<br>M2+Behavioral/Clinical <sup>a</sup> | 0.94 (0.85, 1.04)        | .23                 | 0.84 (0.69, 1.03)        | .09                 | 0.93 (0.78, 1.10)        | .39                 | 0.92 (0.80, 1.04)             | .19                 |
| M4: M3+Socioeconomic <sup>b</sup>          | 0.95 (0.86, 1.05)        | .33                 | 0.85 (0.70, 1.04)        | .11                 | 0.93 (0.78, 1.11)        | .41                 | 0.92 (0.81, 1.05)             | .24                 |
| M5: M4+Social Support <sup>c</sup>         | 0.96 (0.87, 1.07)        | .49                 | 0.86 (0.70, 1.04)        | .12                 | 0.93 (0.78, 1.11)        | .42                 | 0.93 (0.81, 1.06)             | .29                 |

<sup>a</sup>Adjusted for all variables in model 2 plus smoking status, BMI, hypertension, hypercholesterolemia, diabetes mellitus, estimated glomerular filtration rate

<sup>b</sup>Adjusted for all variables in model 3 plus income, education, occupation, perceived standing in the community, healthcare access. Due to low event counts, 3 variables were re-parameterized to reduce the total degrees of freedom for the incident stroke and incident coronary heart disease models only: (1) income was reduced to 3 categories, (2) education was treated as continuous, and (3) occupation was dichotomized.

<sup>c</sup>Adjusted for all variables in model 4 plus social support

**Supplemental Table 4. Hazard ratios for the Associations of Discrimination Measures and All-cause Mortality, Incident Stroke, Incident Coronary Heart Disease, and Heart Failure Hospitalization.**

| <b>Discrimination Variable and Event Type</b> | <b>Quartile 1<br/>(Lowest<br/>Discrimination)</b> | <b>Quartile 2</b> | <b>Quartile 3</b> | <b>Quartile 4<br/>(Highest<br/>Discrimination)</b> |
|-----------------------------------------------|---------------------------------------------------|-------------------|-------------------|----------------------------------------------------|
| <b>Everyday discrimination</b>                |                                                   |                   |                   |                                                    |
| All-cause mortality                           | 1 (referent)                                      | 0.76 (0.60, 0.95) | 0.78 (0.63, 0.98) | 0.69 (0.54, 0.88)                                  |
| Coronary heart disease                        | 1 (referent)                                      | 1.16 (0.79, 1.70) | 1.02 (0.68, 1.53) | 1.01 (0.66, 1.54)                                  |
| Heart failure hospitalization                 | 1 (referent)                                      | 0.81 (0.61, 1.08) | 0.83 (0.62, 1.11) | 0.79 (0.58, 1.09)                                  |
| Incident stroke                               | 1 (referent)                                      | 1.00 (0.66, 1.53) | 0.92 (0.59, 1.43) | 0.85 (0.53, 1.36)                                  |
| <b>Lifetime discrimination</b>                |                                                   |                   |                   |                                                    |
| All-cause mortality                           | 1 (referent)                                      | 0.94 (0.74, 1.19) | 0.74 (0.60, 0.92) | 0.88 (0.69, 1.13)                                  |
| Coronary heart disease                        | 1 (referent)                                      | 1.24 (0.83, 1.85) | 0.78 (0.54, 1.14) | 0.87 (0.57, 1.34)                                  |
| Heart failure hospitalization                 | 1 (referent)                                      | 1.05 (0.77, 1.44) | 0.81 (0.61, 1.07) | 1.01 (0.74, 1.38)                                  |
| Incident stroke                               | 1 (referent)                                      | 1.01 (0.65, 1.59) | 0.82 (0.55, 1.23) | 0.71 (0.43, 1.16)                                  |
| <b>Burden of lifetime discrimination</b>      |                                                   |                   |                   |                                                    |
| All-cause mortality                           | 1 (referent)                                      | 0.88 (0.69, 1.11) | 0.90 (0.70, 1.14) | 0.87 (0.68, 1.11)                                  |
| Coronary heart disease                        | 1 (referent)                                      | 0.87 (0.59, 1.29) | 1.08 (0.74, 1.59) | 0.58 (0.36, 0.93)                                  |
| Heart failure hospitalization                 | 1 (referent)                                      | 0.86 (0.64, 1.16) | 0.85 (0.63, 1.16) | 0.80 (0.59, 1.10)                                  |

| <b>Discrimination Variable and Event Type</b> | <b>Quartile 1<br/>(Lowest<br/>Discrimination)</b> | <b>Quartile 2</b> | <b>Quartile 3</b> | <b>Quartile 4<br/>(Highest<br/>Discrimination)</b> |
|-----------------------------------------------|---------------------------------------------------|-------------------|-------------------|----------------------------------------------------|
| Incident stroke                               | 1 (referent)                                      | 0.92 (0.61, 1.39) | 0.62 (0.38, 0.99) | 0.74 (0.46, 1.18)                                  |

Discrimination variables modeled as categorical variables (quartiles). Hazard ratios and 95% confidence intervals shown are for the fully adjusted model (adjusted for age, sex, body mass index, smoking status, hypertension, hypercholesterolemia, diabetes, estimated glomerular filtration rate, education, income, occupation, perceived standing in the community, healthcare access, and social support). Due to low event counts, 3 variables were re-parameterized to reduce the total degrees of freedom for the incident stroke and incident coronary heart disease models only: (1) income was reduced to 3 categories, (2) education was treated as continuous, and (3) occupation was dichotomized.
